# Supplementary material for: Chemical equilibria of aqueous ammonium–carboxylate systems in aqueous bulk, close to and at the water–air interface
Source: Royal Society of Chemistry journal article supplement (doi:10.1039/c9cp02449b), 2019-01-01
Supplement: c9cp02449b1.pdf [file c9cp02449b1.pdf]

# Chemical equilibria of aqueous ammonium-carboxylate systems in aqueous bulk, close to and at the water-air interface

Yina Salamanca Blanco,<sup>a,†</sup> Önder Topel,<sup>a,‡</sup> Éva G. Bajnóczi,<sup>a</sup> Josephina Werner,<sup>a,b</sup> Olle Björneholm<sup>b</sup> and Ingmar Persson<sup>a,\*</sup>

<sup>a</sup> Department of Chemistry and Biotechnology, Swedish University of Agricultural Sciences, P.O. Box 7015, SE-750 07 Uppsala, Sweden,

<sup>b</sup> Department of Physics and Astronomy, Uppsala University, P.O. Box 516, SE-751 20 Uppsala, Sweden.

Electronic Supplementary Information

**Table S1.** Summary of acidic constants of the carboxylic acids, RCOOH, R=C<sub>n</sub>H<sub>2n+1</sub>, n=0-8, and the ammonium ion, NH<sub>4</sub><sup>+</sup>, at zero, 0.2, 0.50 and 1.00 mol·dm<sup>-3</sup> ionic strength and 298 K, the stability constant, K<sub>x</sub>, of the reaction RCOO<sup>-</sup> + NH<sub>4</sub><sup>+</sup> ⇌ RCOOH + NH<sub>3</sub> at 0.0/0.20/0.50/1.00 mol·dm<sup>-3</sup> ionic strength and 298 K, the percentage carboxylic acid in the aqueous phase calculated from the K<sub>x</sub>, RCOOH<sub>calc</sub>.

| Common name     | pK <sub>a</sub>                   | pK <sub>x</sub>                   | RCOOH <sub>calc</sub>   |
|-----------------|-----------------------------------|-----------------------------------|-------------------------|
| Formic acid     |                                   | 3.75 <sup>a</sup> /3.53/3.50/3.46 | 5.50/5.78/5.85/5.97     |
| Acetic acid     | 4.75 <sup>a</sup> /4.56/4.55/4.53 | 4.50/4.75/4.80/4.91               | 0.56/0.42/0.40/0.35     |
| Propionic acid  | 4.87 <sup>a</sup> /4.69/4.68/4.66 | 4.38/4.62/4.67/4.78               | 0.65/0.49/0.46/0.41     |
| Butyric acid    | 4.81 <sup>a</sup> /4.74/4.71/4.64 | 4.44/4.57/4.64/4.80               | 0.60/0.52/0.48/0.40     |
| Valeric acid    | 4.82 <sup>a</sup> /4.76/-/-       | 4.43/4.55/-/-                     | 0.61/0.53/-             |
| Caproic acid    | 4.88 <sup>a</sup> /-/ -           | 4.37 <sup>b</sup> /-/ -           | 0.65 <sup>b</sup> /-/ - |
| Enanthic acid   | 4.89 <sup>a</sup> /-/ -           | 4.36 <sup>b</sup> /-/ -           | 0.66 <sup>b</sup> /-/ - |
| Caprylic acid   | 4.89 <sup>a</sup> /-/ -           | 4.36 <sup>b</sup> /-/ -           | 0.66 <sup>b</sup> /-/ - |
| Pelargonic acid | 4.96 <sup>a</sup> /-/ -           | 4.29 <sup>b</sup> /-/ -           | 0.71 <sup>b</sup> /-/ - |
| Ammonium ion    | 9.25 <sup>a</sup> /9.31/9.35/9.43 |                                   |                         |

<sup>a</sup> CRC Handbook of Chemistry and Physics, Lide, D. R., Ed., 96<sup>th</sup> edition 2015-2016, p. 5-93-102.

<sup>b</sup> As the pK<sub>a</sub> value for the ammonium ion increases with increasing ionic strength, while the opposite is found for the carboxylic acids the pK<sub>x</sub> values at zero ionic strength can be regarded as minimum values and the highest possible calculated RCOOH concentrations.

**Table S2.** Summary of the accumulated amount ammonia trapped in vessel 2 during 24 hours recalculated to percentage of complete reaction at 0.10/0.25/0.50 mol·dm<sup>-3</sup> ammonium carboxylate concentration (Accum. NH<sub>3</sub> (%), 24 h), the observed amount carboxylic acid formed in the aqueous bulk determined by <sup>1</sup>H-NMR recalculated to percentage of complete reaction (NMR (%)), and the initial reaction rates in aqueous solution from the amount ammonia trapped in vessel 2 at 0.10/0.50 mol·dm<sup>-3</sup> ammonium carboxylate concentration (init. reac. rate (mmol·dm<sup>-3</sup>/h)).

| Carboxylic acid | Theor. NH <sub>3</sub> /RCOOH (%) <sup>*</sup> | Accum. NH <sub>3</sub> (%), 24 h | NMR (%)           | Init. reac. rate (mM/h) | Reac. rate after 24 h (mM/h) |
|-----------------|------------------------------------------------|----------------------------------|-------------------|-------------------------|------------------------------|
| Formic acid     | 0.18                                           | 0.53/-/0.57                      | 0.68 <sup>a</sup> | 0.061/-/0.26            | 0.014/-/                     |
| Acetic acid     | 0.56                                           | 1.20/1.08/0.94                   | 1.24 <sup>b</sup> | 0.094/0.23/0.42         | 0.034/0.075/0.205            |
| Propionic acid  | 0.65                                           | 1.36/1.25/1.29                   | 1.26 <sup>a</sup> | 0.13/0.22/0.52          | 0.031/0.068/0.185            |
| Butyric acid    | 0.60                                           | 1.56/1.51/1.33                   | 1.54 <sup>a</sup> | 0.15/0.33/0.68          | 0.025/0.065/0.165            |
| Valeric acid    | 0.61                                           | 1.02/-/0.96                      | -                 | 0.075/0.21/0.32         | 0.034/0.063/0.175            |
| Caproic acid    | 0.65                                           | 1.48/1.49/1.59                   | 1.52 <sup>a</sup> | 0.16/0.36/0.66          | 0.019/0.055/0.105            |
| Enanthic acid   | 0.66                                           | 1.66/1.54/1.91                   | 1.58 <sup>a</sup> | 0.12/0.29/0.66          | 0.019/0.055/0.080            |
| Caprylic acid   | 0.66                                           | 0.95/3.20/6.14                   | 6.20 <sup>c</sup> | 0.059/0.52/1.98         | 0.033/0.275/0.975            |
| Pelargonic acid | 0.71                                           | 3.55/-/13.31                     |                   | 0.19/-/4.80             | 0.162/-/1.99                 |
| Succinic acid   | 0.62                                           | 2.75/-/-                         | -                 | -                       |                              |

<sup>a</sup> 0.25 mol·dm<sup>-3</sup> solution

<sup>b</sup> 0.10 mol·dm<sup>-3</sup> solution

<sup>c</sup> 0.50 mol·dm<sup>-3</sup> solution

<sup>\*</sup> extrapolated to zero ionic strength

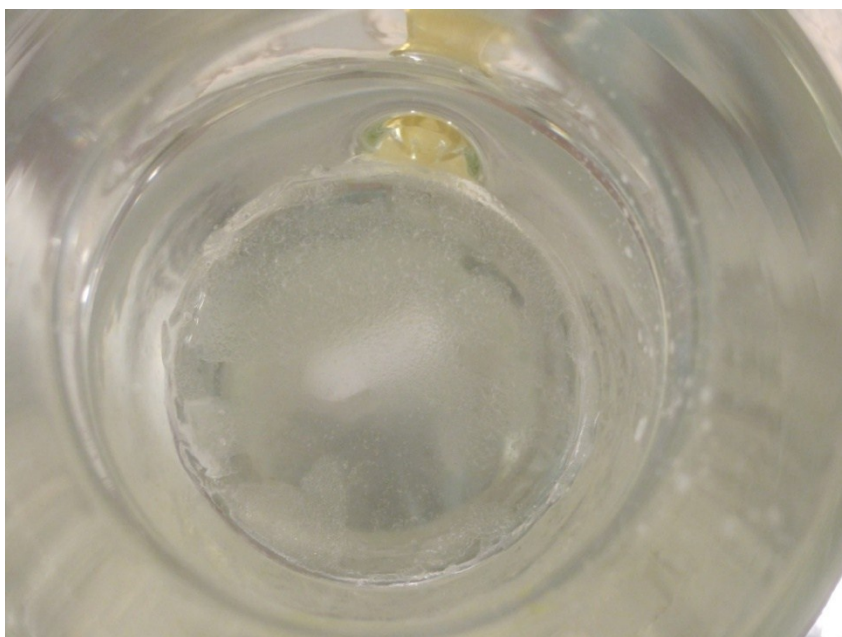

**Figure S1a.** Photo of the disc of solid n-octanoic acid from top. Note the white stirrer bar at bottom on the vessel.

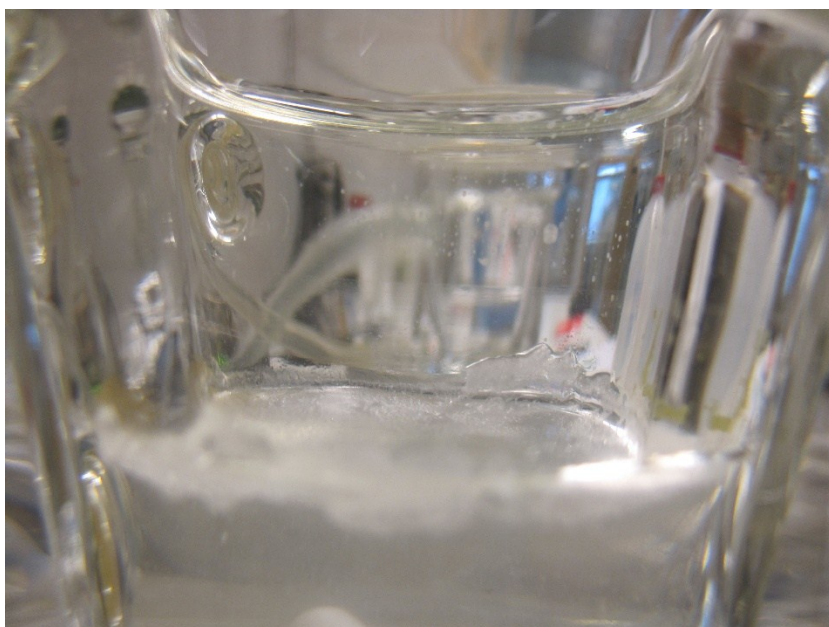

**Figure S1b.** Photo of the disc of solid n-octanoic acid from side of the vessel.

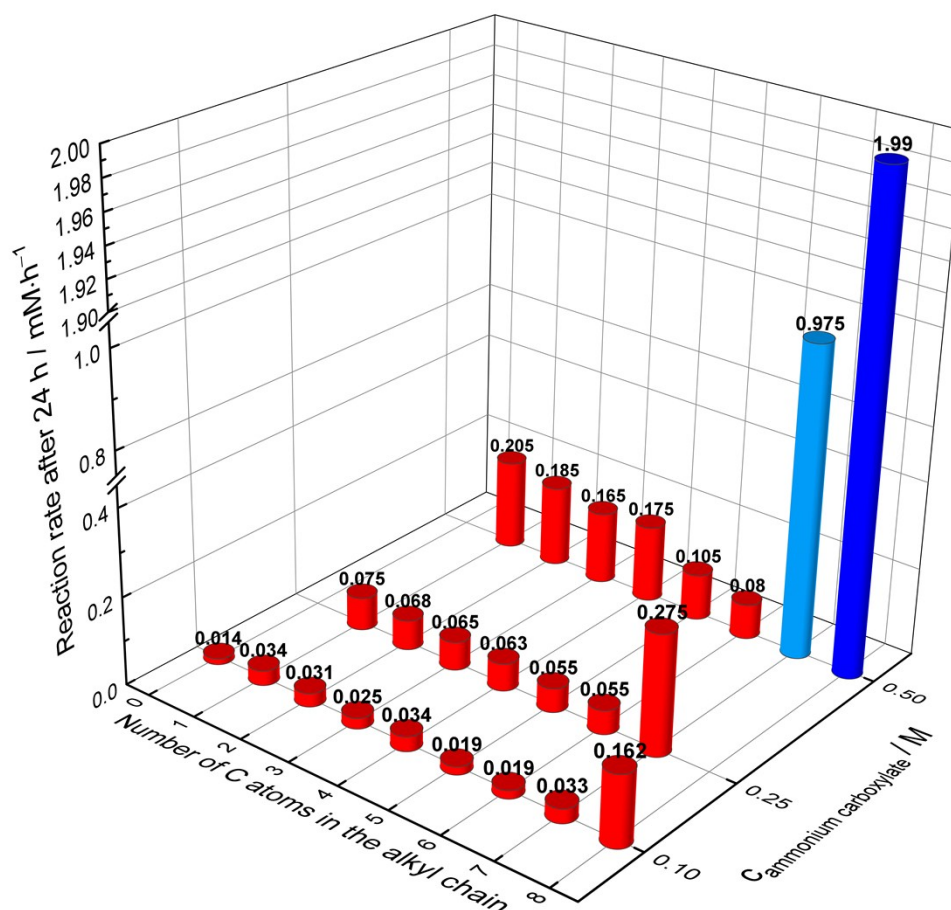

**Figure S2.** The reaction rate after 24 hours of the ammonia release as function of initial ammonium carboxylate and the number of carbon atoms in the alkyl chain at 298.15 K and at 4.0 mL·s<sup>-1</sup> N<sub>2</sub> flow rate.
